# Supplementary material for: Synergistic radical generation and electron transfer mechanisms in oxygen-deficient Co3O4: bridging defect concentration and catalytic efficiency in PMS-based AOPs
Source: Royal Society of Chemistry journal article supplement (doi:10.1039/d5cc03321g), 2025-01-01
Supplement: d5cc03321g1.pdf [file d5cc03321g1.pdf]

## **Supporting Information**

# **Synergistic Radical Generation and Electron Transfer Mechanisms in Oxygen-Deficient Co<sub>3</sub>O<sub>4</sub>: Bridging Defect Concentration and Catalytic Efficiency in PMS-Based AOPs**

Yanjing Zhang, Guanpu Zeng, Rui Lv, Jing Lan, Zongshan Zhao and Guoliang Li\*

School of Environment and Geography, Qingdao University, Qingdao 266071, China

\*Corresponding author: Guoliang Li, [glli@qdu.edu.cn](mailto:glli@qdu.edu.cn)

## Text 1 Materials

All chemicals were used without further purification, including cobalt(II) nitrate hexahydrate ( $\text{Co}(\text{NO}_3)_2 \cdot 6\text{H}_2\text{O}$ ,  $\geq 98.5\%$ ) 2-methylimidazole (2-MeIm, 98%), methanol ( $\text{MeOH}$ , 99.9%), sulfuric acid ( $\text{H}_2\text{SO}_4$ ,  $\geq 98\%$ ), sodium hydrogen carbonate ( $\text{NaHCO}_3$ ,  $\geq 99.5\%$ ), sodium chloride ( $\text{NaCl}$ ,  $\geq 99.5\%$ ), anhydrous sodium sulfate ( $\text{Na}_2\text{SO}_4$ ,  $\geq 99\%$ ), sodium nitrate ( $\text{NaNO}_3$ ,  $\geq 99\%$ ), tert-butyl alcohol (TBA,  $\geq 99.5\%$ ), p-benzoquinone (pBQ,  $\geq 99\%$ ), tetracycline (TC), Potassium monopersulfate triple salt (PMS, 42%-46%  $\text{KHSO}_5$  basis).

## Text 2 Sample Preparation

The cubic ZIF-67, acting as template, was firstly synthesized according to previously reported literature with some modification<sup>1</sup>. Typically, cobaltous nitrate hexahydrate (464 mg) and CTAB (8 mg) were dissolved in 18 mL deionized water, which labeled as solution A. 2-methylimidazole (5.68 g) was dissolved in 100 mL deionized water and labeled as solution B. Then solution A was quickly poured into solution B and magnetically stirred at room temperature for 30 min, the obtained purple solid was then centrifuged and washed with deionized water and methanol for several times, and finally dried at 70°C overnight. The obtained ZIF-67 nano cubes were then submitted to a pyrolysis procedure in a tube furnace under flowing Ar at 550°C (heating rate: 2°C min<sup>-1</sup>) for 2 hours, followed by annealing at 250°C in air for 2 hours. After cooling to room temperature, the samples composed of small  $\text{Co}_3\text{O}_4$  nanoparticles, named as S- $\text{Co}_3\text{O}_4$ , were obtained. Accordingly, samples composed of medium sized nanoparticles and larger particles, named as M- $\text{Co}_3\text{O}_4$  and B- $\text{Co}_3\text{O}_4$  respectively, were synthesized similarly but annealed at 400°C and 550°C in air, respectively.

### **Text 3 Characterization methods**

The morphology of catalysts was imaged by scanning electron microscopy (SEM) (GeminiSEM 360) and transmission electron microscopy (TEM) (JEM-F200). X-ray diffraction (XRD) patterns were recorded using a Bruker-D8 Advance with Cu K $\alpha$  radiation (50–149 kV, 200 mA) in the 2 $\theta$  range of 10°–80° at a scanning rate of 5°/min. Fourier transform infrared (FT-IR) spectra were obtained on a Thermo Fisher Scientific Nicolet iS20 spectrometer. Surface analysis was performed by X-ray photoelectron spectroscopy (XPS, Thermo Scientific K-Alpha) with monochromatized Al K $\alpha$  excitation. Reactive oxygen species detection was carried on an electron paramagnetic resonance (EPR, Bruker A300), where  $^1\text{O}_2$  was trapped with TEMP (2,2,6,6-tetramethylpiperidine) in ultrapure water.

## Text 4 Experimental Procedure

*Degradation experiment:* All experiments were conducted in 50 ml conical flasks. Typically, 20 mg of catalyst was dispersed in 50 ml TC solution (20 mg mL<sup>-1</sup>) under magnetic stirring at room temperature. The initial pH of the solution was measured and adjusted with 0.1 mol/L H<sub>2</sub>SO<sub>4</sub> or NaOH. To initiate the reaction, after loading 1 mM PMS to initiate reaction, 3 ml aliquots were collected at certain intervals, immediately quenched with 1 ml ethanol, filtered through 0.22 µm membranes, and then analyzed at  $\lambda = 356$  nm via a UV spectrophotometer. Each experiment included triplicate trials, and the observed rate constant ( $k_{\text{obs}}$ ) was calculated via the pseudo-first-order kinetic model:

$$\ln\left(\frac{C}{C_0}\right) = -k_{\text{obs}}t \quad \text{S1}$$

Where  $k_{\text{obs}}$  is the apparent rate constant,  $C$  is the TC concentration at time  $t$ , and  $C_0$  is the initial concentration of TC.

*Electrochemical analysis tests:* A Gamry Reference 3000 workstation with a three-electrode system (glassy carbon working electrode, Pt counter electrode, Ag/AgCl reference electrode) in 0.5 M Na<sub>2</sub>SO<sub>4</sub> electrolyte was used to investigate the electron transfer in the catalytic system.

## Text 5 Quantifying the steady-state concentration of reactive species

The steady state concentrations of  $\bullet\text{OH}$ ,  $\bullet\text{SO}_4^-$  and  $^1\text{O}_2$  ( $[\bullet\text{OH}]_{\text{ss}}$ ,  $[\bullet\text{SO}_4^-]_{\text{ss}}$ ,  $[^1\text{O}_2]_{\text{ss}}$ , M) in the S- $\text{Co}_3\text{O}_4$ /PMS processes can be calculated using BA, NB and FFA as probe compounds. The probe compounds are at concentration levels (0.2 mg/L for BA, NB and FFA) that would not affect degradation of TC (Fig. S8a). The second-order reaction rate constants between organic compounds and reactive species ( $\text{M}^{-1}\cdot\text{s}^{-1}$ ) were shown in Table S5.

$$-\ln \frac{[\text{BA}]}{[\text{BA}]_0} = (k_{\text{BA},\bullet\text{OH}}[\bullet\text{OH}]_{\text{ss}} + k_{\text{BA},\bullet\text{SO}_4^-}[\bullet\text{SO}_4^-]_{\text{ss}})t = k_{\text{obs,BA}}t \quad \text{S2}$$

$$-\ln \frac{[\text{NB}]}{[\text{NB}]_0} = (k_{\text{NB},\bullet\text{OH}}[\bullet\text{OH}]_{\text{ss}} + k_{\text{NB},\bullet\text{SO}_4^-}[\bullet\text{SO}_4^-]_{\text{ss}})t = k_{\text{obs,NB}}t \quad \text{S3}$$

$$-\ln \frac{[\text{FFA}]}{[\text{FFA}]_0} = (k_{\text{FFA},\bullet\text{OH}}[\bullet\text{OH}]_{\text{ss}} + k_{\text{FFA},\bullet\text{SO}_4^-}[\bullet\text{SO}_4^-]_{\text{ss}} + k_{\text{FFA},^1\text{O}_2}[^1\text{O}_2]_{\text{ss}})t = k_{\text{obs,FFA}}t \quad \text{S4}$$

The pseudo-first-order reaction rate constants ( $k_{\text{obs,BA}}$ ,  $k_{\text{obs,NB}}$  and  $k_{\text{obs,FFA}}$ ) can be obtained from the plots of  $-\ln \frac{[\text{BA}]}{[\text{BA}]_0}$ ,  $-\ln \frac{[\text{NB}]}{[\text{NB}]_0}$  and  $-\ln \frac{[\text{FFA}]}{[\text{FFA}]_0}$  versus time, respectively (Fig. S9b). Then,  $[\bullet\text{OH}]_{\text{ss}}$ ,  $[\bullet\text{SO}_4^-]_{\text{ss}}$ ,  $[^1\text{O}_2]_{\text{ss}}$  can be obtained by solving Equations S2-4.

Then, the contribution of  $R_{\bullet\text{OH}}$ ,  $R_{\bullet\text{SO}_4^-}$  and  $R_{^1\text{O}_2}$  could be obtained:

$$R_{\bullet\text{OH}} = \frac{k_{\text{TC},\bullet\text{OH}}[\bullet\text{OH}]_{\text{ss}}}{k_{\text{TC}}} \quad \text{S5}$$

$$R_{\bullet\text{SO}_4^-} = \frac{k_{\text{TC},\bullet\text{SO}_4^-}[\bullet\text{SO}_4^-]_{\text{ss}}}{k_{\text{TC}}} \quad \text{S6}$$

$$R_{^1\text{O}_2} = 1 - R_{\bullet\text{OH}} - R_{\bullet\text{SO}_4^-} \quad \text{S7}$$

## Text 6 The mechanism proceeds in the S-Co<sub>3</sub>O<sub>4</sub>/PMS system

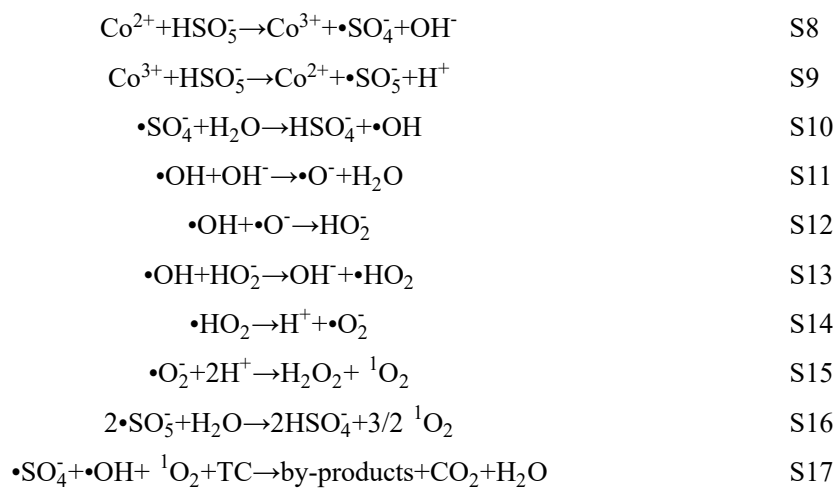

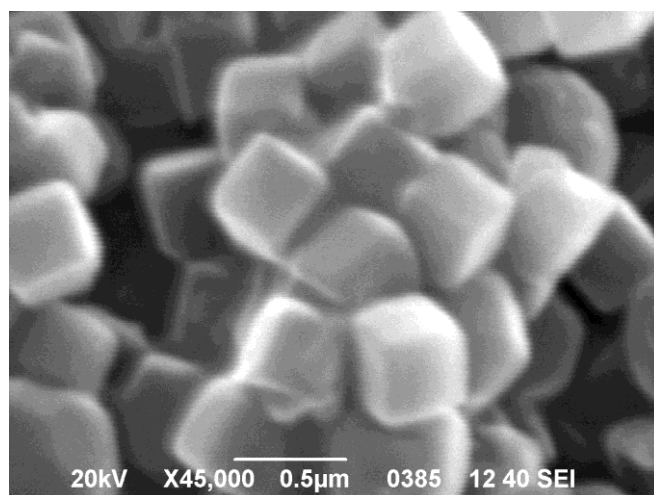

Fig. S1. The SEM images of ZIF-67

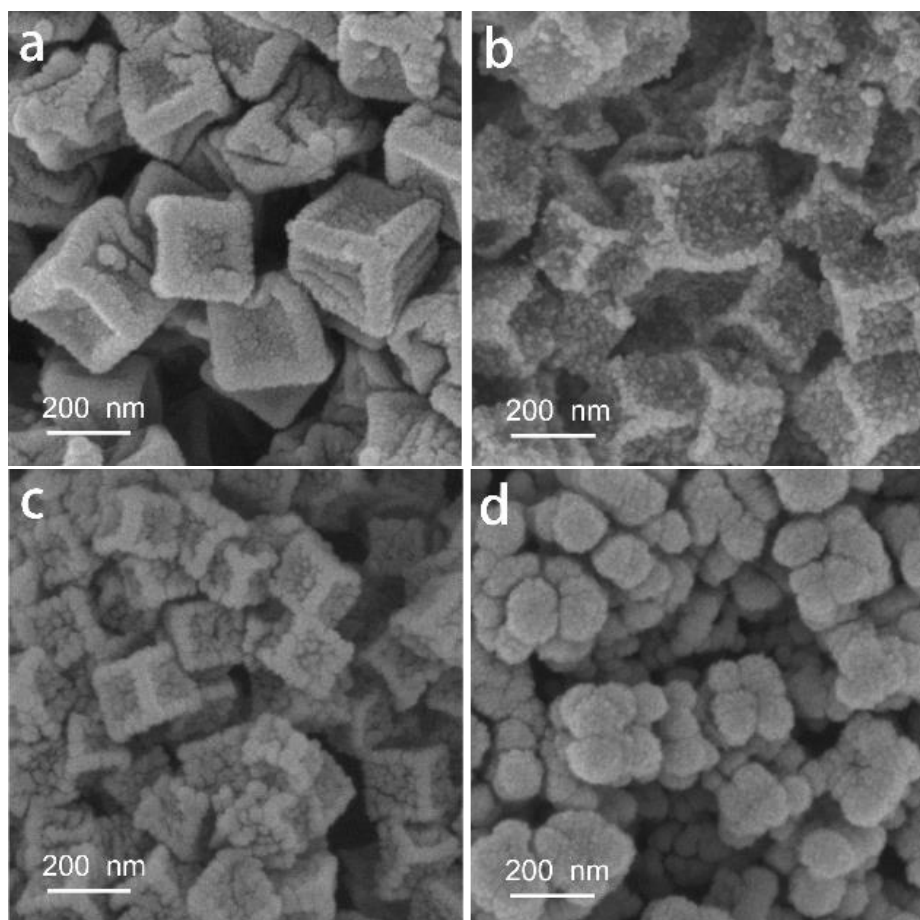

Fig. S2. The SEM images of Co@C (a), S-Co<sub>3</sub>O<sub>4</sub> (b), M-Co<sub>3</sub>O<sub>4</sub> (c) and B-Co<sub>3</sub>O<sub>4</sub> (d).



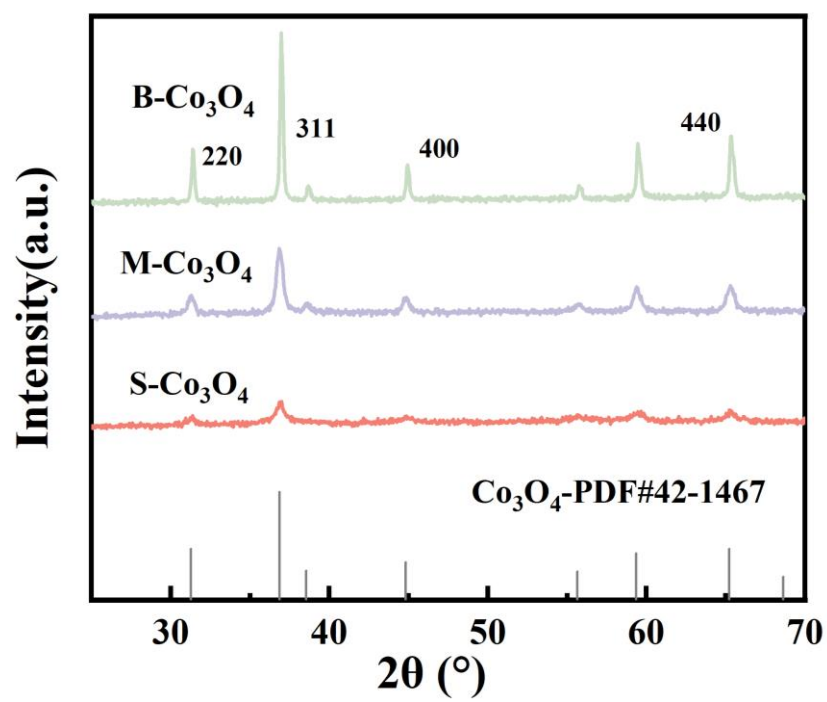

Fig. S3. XRD patterns of S\M\B-Co<sub>3</sub>O<sub>4</sub>.

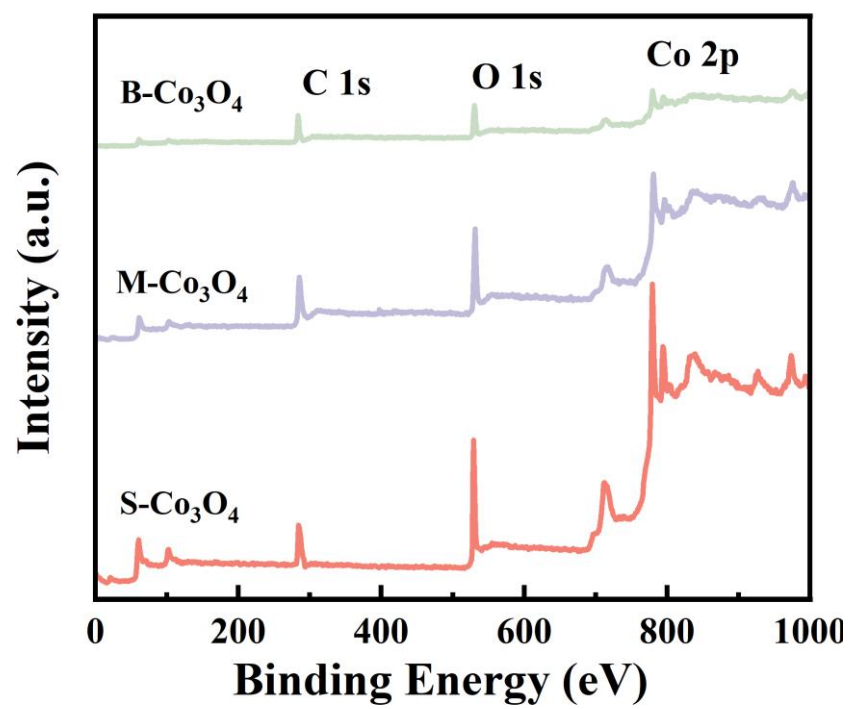

Fig. S4. XPS full spectrum of S/M/B-Co<sub>3</sub>O<sub>4</sub>.

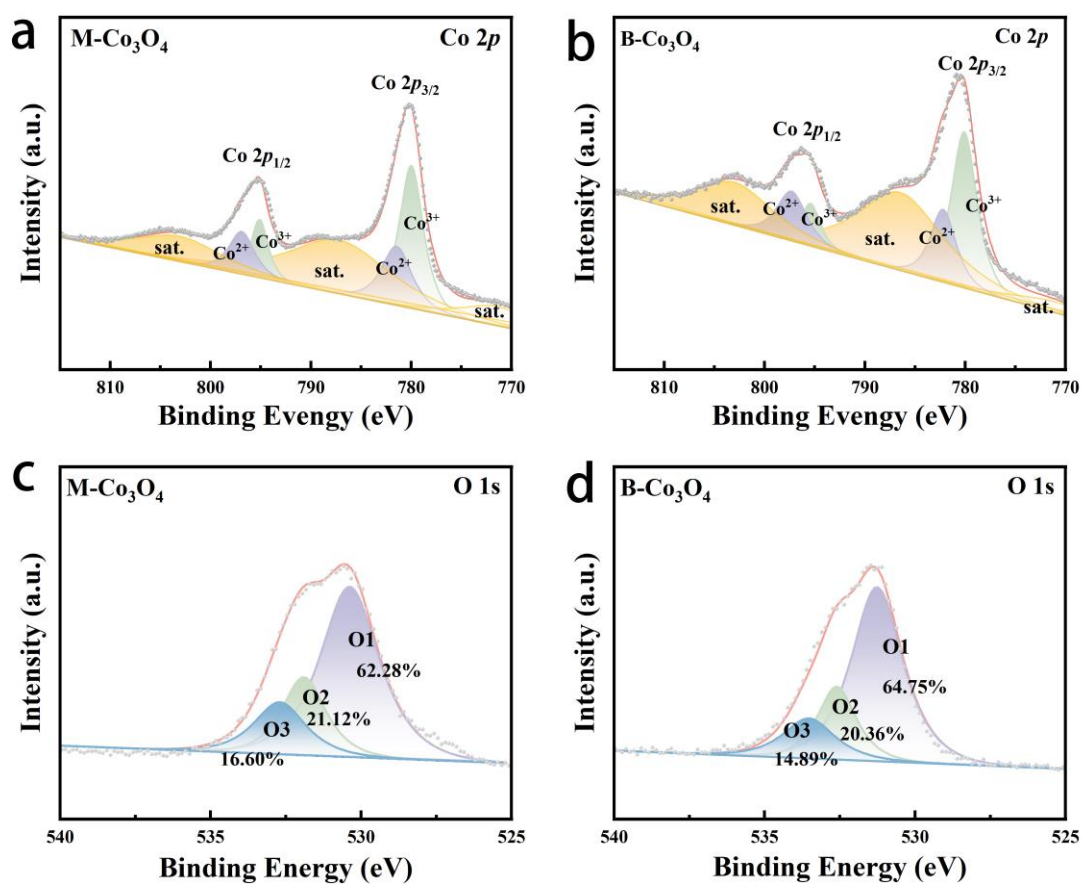

Fig. S5. XPS spectrum of Co 2p (a, b) and O 1s (c, d) of M-Co<sub>3</sub>O<sub>4</sub> and B-Co<sub>3</sub>O<sub>4</sub>, respectively.

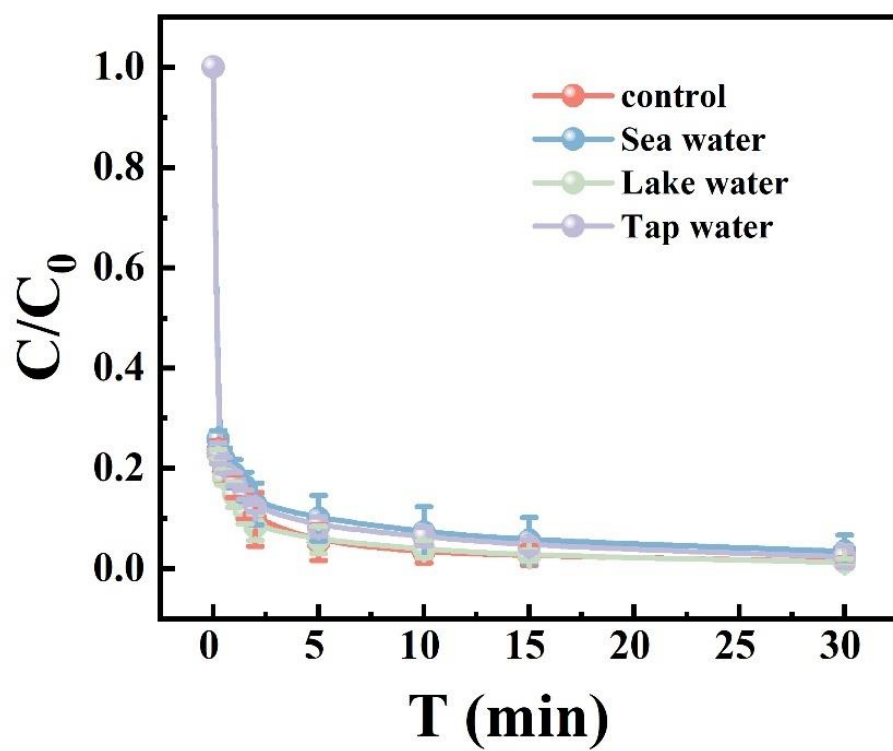

Fig. S6. Different water bodies

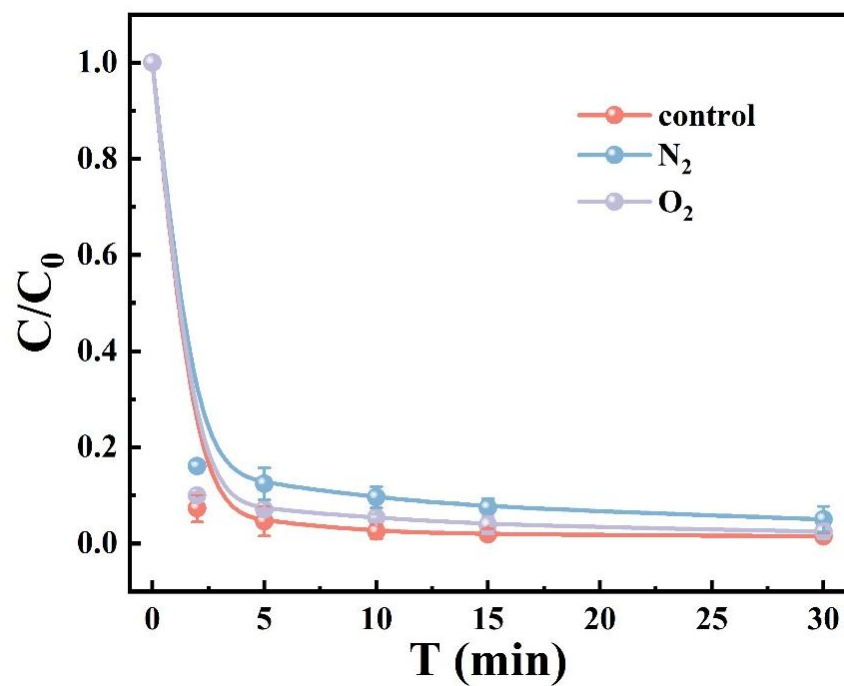

Fig. S7. The influence of different gases on the degradation experiment.

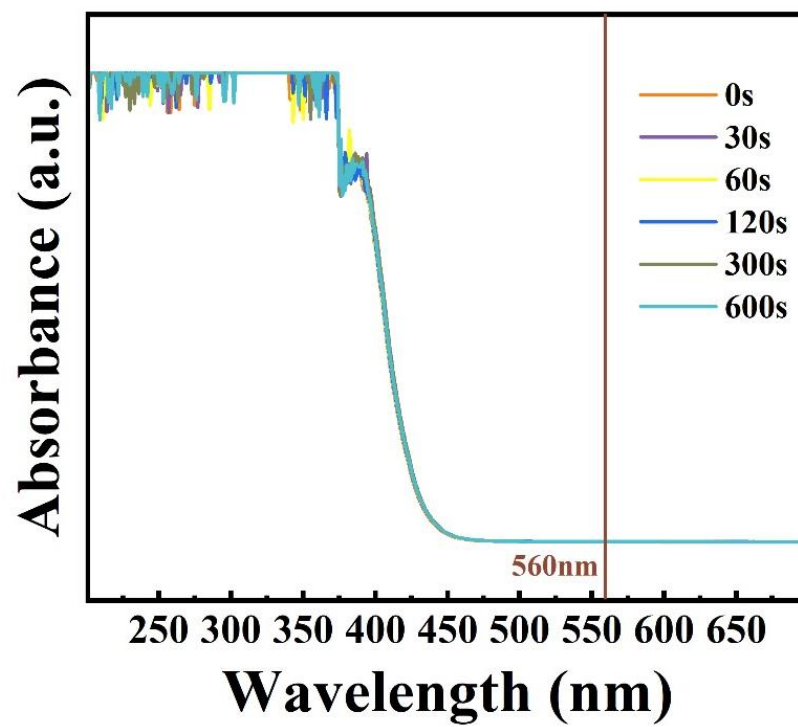

Fig. S8. NBT test of  $\bullet\text{O}_2^-$ .

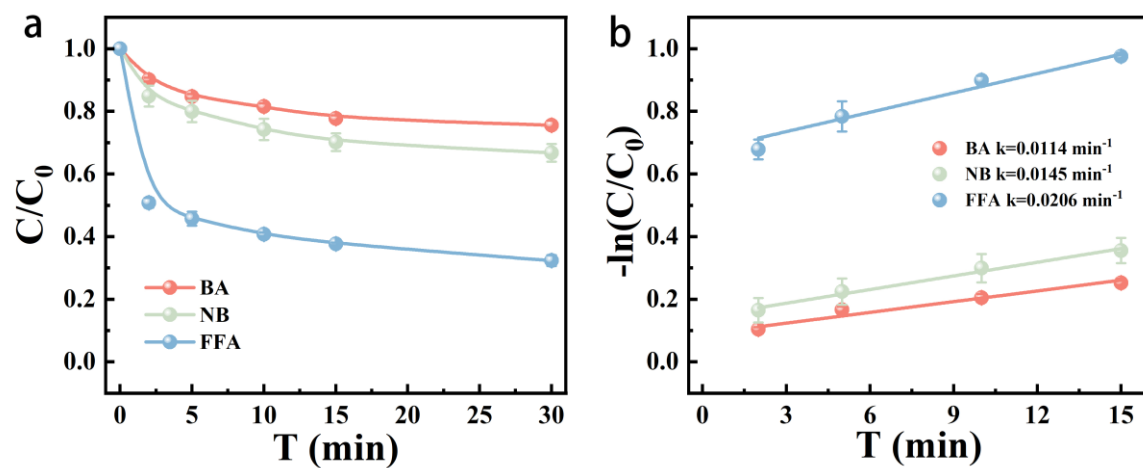

Fig. S9. The degradation(a) and the pseudo first-order kinetic model fitting(b) of probes in S-Co<sub>3</sub>O<sub>4</sub>/PMS.

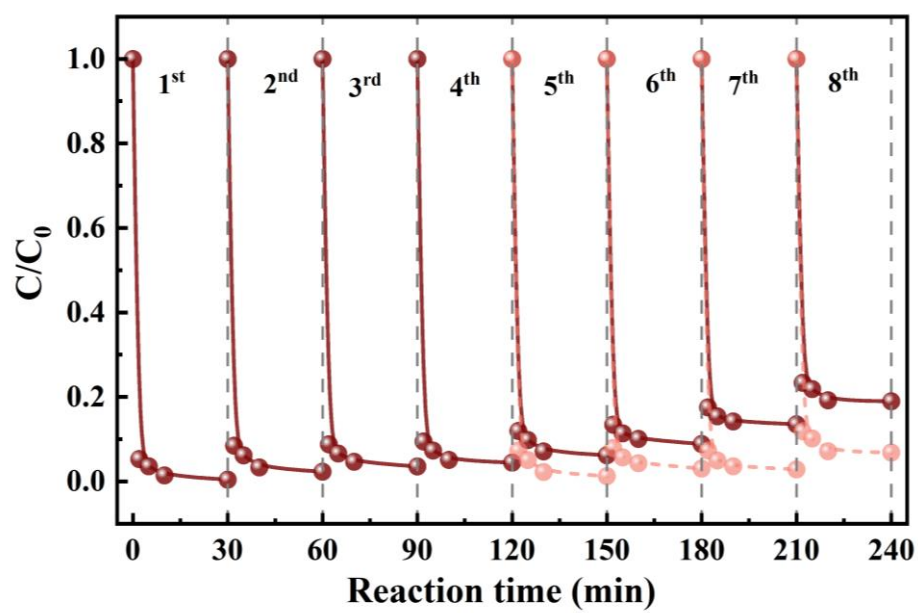

Fig. S10. Catalyst recycling experiment (The deep red solid lines represent the experimental data, and the light red dashed lines represent the calculated compensation data).



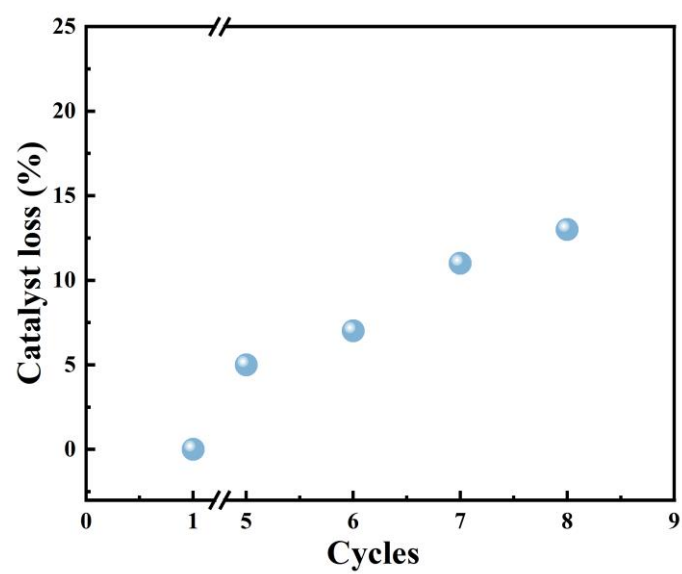

Fig. S11. The dose loss of the catalyst in the cyclic experiment.

Table S1. Comparisons of *S-Co<sub>3</sub>O<sub>4</sub>* with previously reported metal catalysts for TC degradation by PMS activation.

| Catalysts (g·L <sup>-1</sup> )                           | PMS dosage<br>(g·L <sup>-1</sup> ) | Pollutant concentration<br>(mg·L <sup>-1</sup> ) | Degradation time(min) and<br>efficiency (%) | Ref.              |
|----------------------------------------------------------|------------------------------------|--------------------------------------------------|---------------------------------------------|-------------------|
| NiO/SnO <sub>2</sub> (0.4)                               | 0.2                                | 20                                               | 20/90                                       | 2022 <sup>2</sup> |
| Mn-MoS <sub>2</sub> @AABs(3.0)                           | 0.4                                | 20                                               | 90/80                                       | 2022 <sup>3</sup> |
| MIL-101(Fe)/Co <sub>3</sub> O <sub>4</sub> (0.3)         | 0.6                                | 100                                              | 40/86                                       | 2022 <sup>4</sup> |
| Fe-NPC-600(0.2)                                          | 0.3                                | 30                                               | 20/90                                       | 2023 <sup>5</sup> |
| MnFe <sub>2</sub> O <sub>4</sub> /MoS <sub>2</sub> (0.2) | 0.3                                | 10                                               | 30/92.9                                     | 2024 <sup>6</sup> |
| Fe <sub>3</sub> O <sub>4</sub> @PANI-p (0.4)             | 4mm                                | 20                                               | 90/89.1                                     | 2023 <sup>7</sup> |
| Co-CNNT (0.2)                                            | 0.8mM                              | 10                                               | 24/95.4                                     | 2023 <sup>8</sup> |
| <b>S-Co<sub>3</sub>O<sub>4</sub>(0.4)</b>                | <b>0.3</b>                         | <b>20</b>                                        | <b>10/98.6</b>                              | <b>This work</b>  |

Table S2. The element content of the as-prepared samples tested by XPS

| Sample                               | Co           | O            | C            |
|--------------------------------------|--------------|--------------|--------------|
| <b>S-Co<sub>3</sub>O<sub>4</sub></b> | <b>10.54</b> | <b>30.47</b> | <b>58.99</b> |
| M-Co <sub>3</sub> O <sub>4</sub>     | 12.69        | 29.68        | 57.68        |
| B-Co <sub>3</sub> O <sub>4</sub>     | 6.10         | 30.75        | 63.15        |

Table S3. XPS of O 1s deconvolution information of different samples.

| Sample                               | <i>O1</i> | <i>O2</i>     | <i>O3</i> |
|--------------------------------------|-----------|---------------|-----------|
| <b>S-Co<sub>3</sub>O<sub>4</sub></b> | 22.96%    | <b>53.88%</b> | 23.16%    |
| M-Co <sub>3</sub> O <sub>4</sub>     | 62.28%    | <b>21.12%</b> | 16.60%    |
| B-Co <sub>3</sub> O <sub>4</sub>     | 64.75%    | <b>20.36%</b> | 14.89%    |

Table S4. XPS of Co 2p deconvolution information of different samples.

| Sample                               | <i>Co<sup>2+</sup></i> | <i>Co<sup>3+</sup></i> | <i>Co<sup>2+</sup>/Co<sup>3+</sup></i> |
|--------------------------------------|------------------------|------------------------|----------------------------------------|
| <b>S-Co<sub>3</sub>O<sub>4</sub></b> | <b>50.48%</b>          | <b>49.52%</b>          | <b>101%</b>                            |
| M-Co <sub>3</sub> O <sub>4</sub>     | 39.29%                 | 60.71%                 | 64.71%                                 |
| B-Co <sub>3</sub> O <sub>4</sub>     | 40.88%                 | 59.12%                 | 69.14%                                 |

Table S5. The second-order reaction rate constants between quenchers with various reactive species (M<sup>-1</sup> s<sup>-1</sup>)<sup>9</sup>.

| Quencher                   | Quenched species                                         | $k_{\cdot\text{OH}}$ | $k_{\cdot\text{SO}_4^-}$ | $k_{^1\text{O}_2}$ |
|----------------------------|----------------------------------------------------------|----------------------|--------------------------|--------------------|
| Methanol (MeOH)            | $\cdot\text{OH}$ , $\cdot\text{SO}_4^-$                  | $9.7 \times 10^8$    | $1.1 \times 10^7$        | $3.89 \times 10^3$ |
| <i>tert</i> -butanol (TBA) | $\cdot\text{OH}$                                         | $6 \times 10^8$      | $4 \times 10^5$          | $1.8 \times 10^3$  |
| Furfuryl alcohol (FFA)     | $\cdot\text{OH}$ , $\cdot\text{SO}_4^-$ , $^1\text{O}_2$ | $1.5 \times 10^{10}$ | $1.3 \times 10^{10}$     | $1.2 \times 10^8$  |

Table S6. The second-order reaction rate constants between probe compounds or TC with various reactive species ( $\text{M}^{-1} \text{s}^{-1}$ )<sup>9</sup>.

| Probe compounds           | $k_{\cdot\text{OH}}$ | $k_{\cdot\text{SO}_4^-}$ | $k_{\text{IO}_2}$ | Ref. |
|---------------------------|----------------------|--------------------------|-------------------|------|
| Benzoic acid (BA)         | $1.2 \times 10^9$    | $5.9 \times 10^9$        | -                 | 9    |
| Nitrobenzene (NB)         | $3.9 \times 10^9$    | $< 10^6$                 | -                 | 9    |
| Furfuryl alcohol<br>(FFA) | $1.5 \times 10^{10}$ | $1.3 \times 10^{10}$     | $1.2 \times 10^8$ | 9    |
| Tetracycline (TC)         | $4.6 \times 10^9$    | $2.2 \times 10^9$        | -                 | 10   |

Table S7. The steady-state concentrations and relative ratio of different reactive species to TC degradation in S-Co<sub>3</sub>O<sub>4</sub>/PMS system.

| ROSs                          | Steady-state concentration (M)           | Relative ratio of total ROS (%) |
|-------------------------------|------------------------------------------|---------------------------------|
| •OH                           | $3.7 \times 10^{-13}$                    | 15.6                            |
| •SO <sub>4</sub> <sup>-</sup> | $1.1 \times 10^{-12}$                    | 22.2                            |
| <sup>1</sup> O <sub>2</sub>   | <b><math>6.25 \times 10^{-12}</math></b> | <b>62.2</b>                     |

- 1 Y. Zhang, S. T. Zhang, H. A. Li, Y. R. Lin, M. W. Yuan, C. Y. Nan and C. Chen, *Nano Lett.*, 2023, **23**, 9119-9125.
- 2 T. J. Ni, Z. B. Yang, H. Zhang, L. P. Zhou, W. Guo, D. Liu, K. W. Chang, C. P. Ge and Z. J. Yang, *Appl. Surf. Sci.*, 2022, **604**, 154537.
- 3 H. Zhang, C. Liu, Y. Wang, F. F. Jia and S. X. Song, *Chem. Phys. Lett.*, 2022, **806**, 139996.
- 4 Z. H. Hu, H. Q. Wu, F. Zhu, S. Komarneni and J. F. Ma, *Inorg. Chem. Commun.*, 2022, **144**, 109902.
- 5 X. X. Xie, Y. Y. Liu, Y. R. Li, J. Tao, C. Y. Liu, J. P. Feng, L. Feng, Y. X. Shan, S. O. Yang and K. Xu, *J. Taiwan Inst. Chem. Eng.*, 2023, **146**, 104891.
- 6 P. Xu, S. Q. Xie, X. Liu, L. Wang, R. X. Wu and B. L. Hou, *Chem. Eng. J.*, 2024, **480**, 148233.
- 7 Y. Q. Wang, K. Li, M. Y. Shang, Y. Z. Zhang, Y. Zhang, B. L. Li, Y. J. Kan, X. Q. Cao and J. Zhang, *Chem. Eng. J.*, 2023, **451**, 138655.
- 8 B. K. Xu, X. Zhang, Y. Zhang, S. W. Wang, P. Yu, Y. J. Sun, X. Li and Y. H. Xu, *Chem. Eng. J.*, 2023, **466**, 143155.
- 9 Q. Y. Wu, Z. W. Yang, Z. W. Wang and W. L. Wang, *Proceedings of the National Academy of Sciences of the United States of America*, 2023, **120**, e2219923120.
- 10 Y. J. Wang, S. Y. Bao, X. Y. Liu, L. Y. Qiu, J. Sheng, W. W. Yang and Y. S. Yu, *Chem. Eng. J.*, 2023, **477**, 147050.
